# Supplementary material
Source: ML conference proceedings conference paper supplement (https://openreview.net/forum?id=kuhIqeVg0e)
Supplement: supplementary_material [file attachment]

## Sheet: Extracted Data
Text Before First Semicolon	Text After Second Semicolon	psolve average	psolve average Mean	if correct
File: atkins_gpt4.txt
Text Before First Semicolon	Text After Second Semicolon	psolve average	psolve average Mean	if correct
50.70435185185185 atm	50.7 $\mathrm{atm}$	[0.8047805675889229, 0.8701192128271101]	0.83745	correct
The standard enthalpy of solution of AgCl(s) is: 65.71 kJ/mol	+65.49 $\mathrm{kJ} \mathrm{mol}^{-1}$	[0.8427128251027138, 0.8434182030123755, 0.8461614382170675]	0.844097	correct
The change in chemical potential is approximately 7.281 kJ/mol	+7.3 $\mathrm{kJ} \mathrm{mol}^{-1}$	[0.8373639410742664, 0.8726643143630636]	0.855014	correct
66.99718611818304 J/K	67 $\mathrm{J} \mathrm{K}^{-1}$	[0.7778023945875341, 0.8296799030066527]	0.803741	correct
The heat absorbed by the system is 0 J	0	[0.8270137858376753, 0.7516395165033418, 0.7671093075509773]	0.781921	correct
-1368.044856 kJ/mol	-1368 $\mathrm{~kJ} \mathrm{~mol}^{-1}$	[0.8322301299150835, 0.8468902218550346]	0.83956	correct
0.0 kJ	0	[0.8175642219971545, 0.8643078023813936, 0.7947474053113437]	0.82554	correct
The molar mass of the compound is: 207.5411349 g/mol	169 $\mathrm{g} \mathrm{mol}^{-1}$	[0.8830178114661255, 0.831727369567143]	0.857373	wrong
-730.2218017936982 J	-167 $\mathrm{J}$	[0.7867551234980503, 0.770102594554463]	0.778429	wrong
-1.5298204690392925 kJ	-1.5 $\text{kJ}$	[0.7732699224043219, 0.8098089287925007, 0.8275088768728053]	0.803529	correct
0 J/mol	131 $\mathrm{J} \mathrm{mol}^{-1}$	[0.8528999950215835, 0.8524254807923123, 0.8065494192052213]	0.837292	wrong
The change in enthalpy (ΔHm) is 0.0 kJ.	+3.60 $\text{kJ}$	[0.8531168033347862, 0.8302129016284607]	0.841665	wrong
221.81740440077692 J K^-1 mol^-1	152.67 $\mathrm{J} \mathrm{K}^{-1} \mathrm{~mol}^{-1}$	[0.8248796935175436, 0.8216291959808547]	0.823254	wrong
The final temperature of the argon gas is approximately 131.3168233764895 K.	131 $\mathrm{K}$	[0.8206229949132341, 0.8646860036780301, 0.8413847988458857]	0.842231	correct
91.52480322167308 J/K	92 $\mathrm{J} \mathrm{K}^{-1}$	[0.7091843523657761, 0.8023128087645316, 0.8191220131274869]	0.776873	correct
3.031748 kJ	+3.03 $\text{kJ}$	[0.8510278168095889, 0.8441496784530722]	0.847589	correct
-29909090.909090906 K Pa^-1	29.9 $\mathrm{K} \mathrm{MPa}^{-1}$	[0.8091283776291349, 0.7619241623308978, 0.7891626881639748]	0.786738	wrong
The real molar volume of the gas is approximately 1.2041333333333335 dm^3/mol.	1.2 $\mathrm{dm}^3 \mathrm{~mol}^{-1}$	[0.8627120389143937, 0.8230186212258337]	0.842865	correct
6.159347129032806 kg	6.2 $\text{kg}$	[0.8090007259798959, 0.8262267625576213, 0.7953000978256478]	0.810176	correct
The value of Cp is: 13.932643765483073 J K^-1 mol^-1	41.40 $\mathrm{J} \mathrm{K}^{-1} \mathrm{~mol}^{-1}$	[0.8558105576392824, 0.8229726577812233, 0.8014762873761471]	0.826753	wrong
The Gibbs energy change of the reaction at 500K is 7140.0 J/mol	7 $\mathrm{mol}^{-1}$	[0.8821885363386023, 0.8441358885724858]	0.863162	correct
87792.64214046823 J K^-1 mol^-1	+87.8 $\mathrm{J} \mathrm{K}^{-1} \mathrm{~mol}^{-1}$	[0.8057612779703232, 0.8170590357698782, 0.769721862077327]	0.797514	wrong
-114.40 kJ/mol	-114.40 $\text{kJ}$	[0.7854655190552274, 0.8297085508910197]	0.807587	correct
3175419.8978279247 °C	+37 $\text{K}$	[0.7775627555908593, 0.7937923520486866]	0.785678	wrong
The radius of the methane molecules is: 22754441.615494084 nm	0.118 $\mathrm{nm}$	[0.80013614290809, 0.8102673435646354]	0.805202	wrong
98.60808317960759 J K^-1 mol^-1	-87.8 $\mathrm{J} \mathrm{K}^{-1} \mathrm{~mol}^{-1}$	[0.8300702822598084, 0.8369257779893413]	0.833498	wrong
-233.3333333333333 °N	-233 $^{\circ} \mathrm{N}$	[0.7718150746616828, 0.7865251781780783]	0.77917	correct
0.88	0.88	[0.8084858655840041, 0.8111365986579052, 0.7619155024821914]	0.793846	correct
-3.8223038123914024 J	-3.8 $\text{J}$	[0.8869993835618688, 0.8773718897059873, 0.8392260760971029]	0.867866	correct
3.001703896584541 atm	3.0 $\mathrm{atm}$	[0.813928652883286, 0.8737920755040252]	0.84386	correct
The total change in entropy is: 2.8814128295876924 J/K	0	[0.8057598244633836, 0.818202523842244, 0.830284426380799]	0.818082	wrong
0.22 K	-2.99 $\mathrm{K}$	[0.8206406146821434, 0.7667020704373785, 0.8138789427681182]	0.800407	wrong
The Carnot efficiency of the steam turbine is approximately 0.384	0.38	[0.7734893498227576, 0.7788877773346324]	0.776189	correct
The mole fraction of argon in the 'atmospheric nitrogen' is: 0.0048480651025884945	0.011	[0.8225349577399911, 0.8236151092308591, 0.8253489684908556]	0.823833	wrong
-20.265 J	-20 $\text{J}$	[0.763655013268413, 0.8236668020119393]	0.793661	correct
The Joule-Thomson coefficient at 0°C is: 0.7096774193548377 K/atm	0.71 $\mathrm{K} \mathrm{atm}^{-1}$	[0.841648520203362, 0.8234002174004215]	0.832524	correct
0.00130286685269771 K^-1	0.00131 $\mathrm{~K}^{-1}$	[0.8040909552057793, 0.7925415165000835]	0.798316	correct
-15.1679709 kJ/mol	+116.0 $\mathrm{kJ} \mathrm{mol}^{-1}$	[0.8551215720588234, 0.8790049316807155]	0.867063	wrong
27.58 lb in^-2	30 $\mathrm{lb} \mathrm{in}^{-2}$	[0.8144767691850717, 0.8740006296689629]	0.844239	wrong
35.10448068307391 atm.	35.2 $\mathrm{atm}$	[0.8307513324404704, 0.828429959712094]	0.829591	correct
The approximate radius of a $mathrm{Cl}_2$ molecule regarded as a sphere is 23761976.867484972 nm.	0.139 $\mathrm{nm}$	[0.8105230309846202, 0.8070207806189679]	0.808772	wrong
4.125 kJ	+4.1 $\text{kJ}$	[0.8234030134703488, 0.7947520088332508]	0.809078	correct
8.333621133921271 JK^-1 mol^-1	8.3147 $\mathrm{JK}^{-1} \mathrm{~mol}^{-1}$	[0.7257247144705703, 0.8016876962659291, 0.7817833011257137]	0.769732	correct
-3096.9336 kJ/mol	-50 $\mathrm{kJ} \mathrm{mol}^{-1}$	[0.7360306563924199, 0.8749965963261815]	0.805514	wrong
475.784000475 J	-20 $\text{J}$	[0.7958562984434993, 0.8298230773838634]	0.81284	wrong
103.63606567 kPa	102 $\mathrm{kPa}$	[0.8077804420037112, 0.8190510268347881, 0.7961529717835791]	0.807661	correct
The reaction enthalpy is 17.694124000000002 kJ/mol and the standard enthalpy of formation of bis(benzene)chromium is 17.694124000000002 kJ/mol.	+17.7 $\mathrm{~kJ} \mathrm{~mol}^{-1}$	[0.8531617569647968, 0.8575464575429206]	0.855354	correct
0.107	0.11	[0.7966714869827906, 0.8009946034552442]	0.798833	correct
140.50058908674902 atm	140 $\text{atm}$	[0.8577668216477002, 0.85863895455196]	0.858203	correct
239.7 kJ/mol	240 $\mathrm{kJ} \mathrm{mol}^{-1}$	[0.7678585894151871, 0.8158706346140527, 0.8387676308783698]	0.807499	correct
-87.99252 J	-88 $\mathrm{J}$	[0.8505026908049884, 0.7632386270311918]	0.806871	correct
-1.8025875 Pa	0.00017	[0.797606938619098, 0.8042499704103633, 0.8089733089363259]	0.80361	wrong
0.1352852852852853 dm^3/mol	0.1353 $\mathrm{dm}^3 \mathrm{~mol}^{-1}$	[0.8184398044179731, 0.8149609621521873, 0.8056384638875361]	0.813013	correct
q = 0 J	0	[0.7732547090789067, 0.8107651570854658, 0.7907494024269984]	0.79159	correct
ΔS = 18.41 J/K	0	[0.7917792001534846, 0.8223543621533409, 0.808915238603113]	0.807683	wrong
1 atm	0.9974 $\text{atm}$	[0.8036791213992518, 0.8078668595913611]	0.805773	correct
817.8 kJ/mol	817.90 $\mathrm{kJ} \mathrm{mol}^{-1}$	[0.7879904710258788, 0.8811845137157093, 0.8074969400074009]	0.825557	correct
228.0 kJ/mol	228 $\mathrm{kJ} \mathrm{mol}^{-1}$	[0.8285733805534555]	0.828573	correct
37.89397181613057 J K^-1	+0.60 $\mathrm{J} \mathrm{K} \mathrm{K}^{-1}$	[0.8491960128783279, 0.829595118259472]	0.839396	wrong
7387.537336768369	0.7158	[0.8191967617040671, 0.8478753387091548, 0.833394904580524]	0.833489	wrong
The van der Waals parameter a in SI base units is 0.07609507500000003 kg m^5 s^-2 mol^-2.	0.0761 $\mathrm{kg} \mathrm{~m}^5 \mathrm{~s}^{-2} \mathrm{~mol}^{-2}$	[0.8351172199396889]	0.835117	correct
10.031175000000001 kJ	+10 $\text{kJ}$	[0.8158860592215822, 0.8039572817977957]	0.809922	correct
0.9999398640928497	0.6957	[0.8348009850016619, 0.7561052010699244]	0.795453	wrong
15.08 kJ	12 $\text{kJ}$	[0.7573245430636208, 0.7972032838052696, 0.8283700356451421]	0.794299	wrong
-48.09 °C	-273 $^{\circ} \mathrm{C}$	[0.7952162798452335, 0.8099398605584357, 0.7978985962038928]	0.801018	wrong
The van der Waals constant b is 0.666 m^3/mol and the compression factor Z is 0.66.	0.66	[0.8547422272668213, 0.8319153288239857]	0.843329	correct
24.478115 atm	21 $\mathrm{atm}$	[0.8466208939566835]	0.846621	wrong
2.88 J/K	0	[0.8528773331908978, 0.8296256502967417]	0.841251	wrong
ΔH = 0.0 J	0	[0.8145511262426922, 0.8234778136328709]	0.819014	correct
3.38 atm	3.38 $\mathrm{atm}$	[0.8087312483968968, 0.8035312059902919, 0.8568231298228052]	0.823029	correct
The total change in entropy is 2.88 J K^-1	+2.9 $\mathrm{J} \mathrm{K}^{-1}$	[0.842499006710085, 0.8343828281565256]	0.838441	correct
11.415383815777833 kJ/mol	+11 $\mathrm{kJ} \mathrm{mol}^{-1}$	[0.8212832079472087, 0.8382409609146665]	0.829762	correct
3.421313868613139 bar	3.42 $ \mathrm{bar}$	[0.8305944372982784, 0.8408222471451111]	0.835708	correct
-22.107 J/K	-22.1 $\mathrm{J} \mathrm{K}^{-1}$	[0.8379796284983305, 0.7979714527906326]	0.817976	correct
8.25 kJ	+5.41 $\text{kJ}$	[0.831416582867556, 0.8037879043384247, 0.8303580459373879]	0.821854	wrong
0.04255487660414612 atm	0.042 $\text{atm}$	[0.7706977107052136, 0.7602489480447051, 0.817803954798935, 0.7834105162400798]	0.78304	correct
101.325 J	-100 $\mathrm{J}$	[0.8064119266249925]	0.806412	wrong
1406.831923275285 K	1410 $\mathrm{K}$	[0.827160424506129, 0.8025015955195665]	0.814831	correct
-0.35 K	-0.347 $\text{K}$	[0.8300543396653574, 0.7917750970069575, 0.8276702961901493]	0.8165	correct
-97.93844 kJ/mol	+107 $\mathrm{kJ} \mathrm{mol}^{-1}$	[0.9013801887270695, 0.8614101932755825]	0.881395	wrong
24.41 atm	24 $\mathrm{atm}$	[0.8114076890945426, 0.8127320870626891, 0.8648262863685665]	0.829655	correct
24.42 atm	24 $\mathrm{atm}$	[0.7936453101079773, 0.8019886906401125, 0.8522796201844186]	0.815971	correct
27491.329135823402 Pa	0.72	[0.8240686416713686, 0.7990511963258652]	0.81156	wrong
9.138869160931321 kPa	9.14 $\mathrm{kPa}$	[0.8667045134445434, 0.8661449845526473]	0.866425	correct
4.424778761061947 kg	4.09 $\text{kg}$	[0.8040464784955609, 0.7991245406628913]	0.801586	wrong
0.02449114072338556 kPa	0.0245 $\mathrm{kPa}$	[0.7519924572899274, 0.8572771343037116]	0.804635	correct
29.93 J K^-1 mol^-1	22 $\mathrm{J} \mathrm{K}^{-1} \mathrm{~mol}^{-1}$	[0.848701216214169]	0.848701	wrong
2.2600000000000004e-05 m^3/mol	0.0000226 $\mathrm{~m}^3 \mathrm{~mol}^{-1}$	[0.7853956601331787, 0.8008866850784733]	0.793141	wrong
0.5030936368339368 m^3	0.5 $\text{m}^3$	[0.732844899774821, 0.8175473522246923]	0.775196	correct
Entropy change (ΔS) is 36.5 J/K.	-36.5 $\mathrm{J} \mathrm{K}^{-1}$	[0.8149698139579257, 0.8214933729414811]	0.818232	wrong
21.58 kJ/mol	-21 $\mathrm{kJ} \mathrm{mol}^{-1}$	[0.84735860673301, 0.8094872891551169]	0.828423	wrong
The height above the surface of the Earth where the atmosphere becomes 90 percent nitrogen and 10 percent oxygen by mass is approximately -1.0000000000000002 times the scale height of the atmosphere. The pressure of the atmosphere at that height is approximately 1.0001124474157237 atm.	0.0029 $\mathrm{atm}$	[0.7919959393166603, 0.8358870347282156]	0.813941	wrong
0.0 J/K	+93.4 $\mathrm{J} \mathrm{K}^{-1}$	[0.7983677904178133, 0.7739269941294983, 0.8006519675702798]	0.790982	wrong
The change in internal energy is: 2.35 kJ	+2.35 $\text{kJ}$	[0.8302572085355759, 0.776369807093383, 0.817140616842338]	0.807923	correct
-4564.5 kJ/mol	-4564.7 $\mathrm{kJ} \mathrm{mol}^{-1}$	[0.7565757437734925, 0.8030806568386545]	0.779828	correct
The task was not completed. The critical constants were not derived from the given equation.	0.333333	[0.8127042563896553, 0.8329328641202668, 0.8015176130726807]	0.815718	wrong
382.94 kJ/mol	-383 $\mathrm{kJ} \mathrm{~mol}^{-1}$	[0.8012950308645262, 0.8584377701934524]	0.829866	wrong
177.69210868168892 J	-194 $\mathrm{~J}$	[0.8644914014953354, 0.820688905228787]	0.84259	wrong
2548.0 J	2600 $\mathrm{J}$	[0.800440147816901]	0.80044	correct
21.667460172537854 atm	22 $\mathrm{atm}$	[0.7856724079151128, 0.8105612931760602, 0.8366032936921662]	0.810946	correct
0.02449114072338556 kPa	0.0245 $\mathrm{kPa}$	[0.7657185159104194, 0.8095390717063196, 0.8255544713103143]	0.800271	correct
416.0 J	420 $\mathrm{J}$	[0.7970509620779577, 0.7759761254193208]	0.786514	correct
0.215 K	205 $\text{K}$	[0.8057702246275426, 0.7730704226916721]	0.78942	wrong
21.750532729424215 kPa	22 $\text{kPA}$	[0.7481410234753222, 0.8262919259602767]	0.787216	correct
The molar heat capacity at constant volume is: 21.62064052287582 J K^-1 mol^-1	30 $\mathrm{J} \mathrm{K}^{-1} \mathrm{~mol}^{-1}$	[0.8439879621703344, 0.8063411217930762]	0.825165	wrong
-0.5462365625611016 kJ/mol	-0.55 $\mathrm{kJ} \mathrm{mol}^{-1}$	[0.7875845315153186, 0.81839699077539, 0.8304210532199229]	0.812134	correct
-299.02 kJ/mol	-111.92 $\mathrm{kJ} \mathrm{mol}^{-1}$	[0.7815395966235222, 0.8601279194802004]	0.820834	wrong
File: matter_gpt4.txt
Text Before First Semicolon	Text After Second Semicolon	psolve average	psolve average Mean	if correct
2.14°	2.14 ${\circ}$	[0.8187529712444702, 0.8173008285512652, 0.8085783924510522]	0.814877	correct
75.99 Joules	-75 $\mathrm{~J}$	[0.8025700560336516, 0.8118775336010433, 0.8016038927769529]	0.80535	wrong
-0.16666666666666669 J/mol	-0.38 $\mathrm{~J} \mathrm{~mol}^{-1}$	[0.7941215374974578, 0.7930264946501427]	0.793574	wrong
234.299837119694 K	234.4 $ \mathrm{~K}$	[0.7685052515401423, 0.8002480196447883, 0.7989920408199834]	0.789248	correct
110.53497304528521 K	5.5 $10^3 \mathrm{~K}$	[0.8262238188710321, 0.8204264312526907]	0.823325	wrong
The change in Gibbs energy of the ethanol is 0.0 kJ.	12 $\mathrm{~kJ}$	[0.7957861831370829, 0.8077640477546626]	0.801775	wrong
3.5448 eV	3.54 $\mathrm{eV}$	[0.868599204419202, 0.8235928028859818]	0.846096	correct
1442264.0673405293 g/mol	3.61 $10^5 \mathrm{~g} \mathrm{~mol}^{-1}$	[0.7737563398810653, 0.8022777392719638, 0.823737196319089]	0.799924	wrong
1.8752e+08 m/s	1.88 $10^8 \mathrm{~m} \mathrm{~s}^{-1}$	[0.8584114486997908, 0.8633842597507865]	0.860898	correct
48.074 kJ/mol	62.2 $\mathrm{~kJ} \mathrm{~mol}^{-1}$	[0.8062711045504916]	0.806271	wrong
The calculation was not completed due to a failure in the integration subtask.	0.020	[0.79958595063075, 0.801259705765338, 0.820654518789496]	0.807167	wrong
-319392.23 kJ/mol	-1270 $\mathrm{~kJ} \mathrm{~mol}^{-1}$	[0.7924274570004695, 0.798663566668051, 0.8067927105521809]	0.799295	wrong
The final calculation was not completed.	0.5	[0.815714542918459, 0.8136697576512981, 0.7973597023755121]	0.808915	wrong
The theoretical density of diamond is: 7.6551466717197085 g/cm^3	7.654 $\mathrm{~g} \mathrm{~cm}^{-3}$	[0.787687888908859, 0.7803673428998162, 0.7731358785193448]	0.780397	correct
1117979.3234837828 m	0.87 $\mathrm{~m}$	[0.8268263174123337, 0.7813932529954913]	0.80411	wrong
-0.0 kJ/mol	1.07 $10^3 \mathrm{~kJ} \mathrm{~mol}^{-1}$	[0.815666019761045, 0.7914966400604088]	0.803581	wrong
The final answer couldn't be obtained as subtask 3 computation (using Van der Waals equation) failed.	140 $\mathrm{~atm}$	[0.9016096373595152, 0.8568849961889052, 0.857402872111258]	0.871966	wrong
The difference in local magnetic field is 11.4 µT	11 $\mu \mathrm{T}$	[0.8016704887059906, 0.8122974845454878]	0.806984	correct
0.4834483378656841	0.8	[0.8516810847534751, 0.781364430051439, 0.8287674357902332]	0.820604	wrong
0.016666666666666666 seconds	1.7 $10^{-2} \mathrm{~s}$	[0.770108960245146, 0.7234797354620311]	0.746794	wrong
0.03 Pa	0.195 $\mathrm{Pa}$	[0.7776264293340094, 0.7998832156423181, 0.7894861634575062]	0.788999	wrong
-3.0627 kJ/mol	-11.2 $\mathrm{~kJ} \mathrm{~mol}^{-1}$	[0.8265617205214556, 0.8276689303434414, 0.7824133764840123]	0.812215	wrong
The radius of the cavity is 0.21462509515396017 nm.	0.69 $\mathrm{~nm}$	[0.7825834880072122, 0.8335555030873385, 0.826758210809011]	0.814299	wrong
7273895.216242272 m/s	7.27 $10^6 \mathrm{~m} \mathrm{~s}^{-1}$	[0.8642051173314723, 0.8191796021327421]	0.841692	wrong
7.2739e+18 pm/s	7.27 $10^6 \mathrm{~m} \mathrm{~s}^{-1}$	[0.8572583121866958, 0.8482320501197912]	0.852745	correct
The magnitude of the partial charges is 0.12324543937313616e.	0.123	[0.8200220964401709, 0.83229074499125, 0.7997475261270225]	0.817353	correct
The rotational partition function of the NOF molecule at 25°C is 1.4569e-02 x 10^3.	7.97 $10^3$	[0.8500830009123096, 0.7945867117535563]	0.822335	wrong
-16.58 J	-17 $\mathrm{~J}$	[0.8673557280723543, 0.847393451841154, 0.8083252335366747]	0.841025	correct
-0.76 V	-1.46 $\mathrm{V}$	[0.7881469148292283, 0.8035418388625479]	0.795844	wrong
The mass of the solid will decrease by 15.8468 mg in a period of 1.00 h.	16 $\mathrm{mg}$	[0.7790873853671062, 0.7648202803668663]	0.771954	correct
5.1679e+01 pm	52 $\mathrm{pm}$	[0.8742178950461978, 0.8019362272542461, 0.8204793678439293]	0.832211	wrong
The resonance frequency of the electron spin is 2.8000e+13 Hz	2.8 $10^{13} \mathrm{~Hz}$	[0.8233384681420471, 0.8154239477971212]	0.819381	correct
39.69405000000001 mJ	48 $\mathrm{~mJ}$	[0.7927745394010333, 0.8324946889426387, 0.8424503268577234]	0.822573	wrong
39.69405000000001 mJ	48 $\mathrm{~mJ}$	[0.8471551756262281]	0.847155	wrong
4.21 * 10^3	4.4 $10^3$	[0.807760611261659, 0.8018188657017933, 0.8103929279749496]	0.806657	correct
14.059393762786943 eV	14 $\mathrm{eV}$	[0.8283387001529404, 0.8588471105127553, 0.8275859527036705]	0.838257	correct
540.00 s	537 $\mathrm{s}$	[0.8031633894803223, 0.7788237643211168]	0.790994	correct
Not completed	4500 $\mathrm{~K}$	[0.802799087787141, 0.7954343755398888, 0.8026382813014376]	0.800291	wrong
-44.44 kJ/mol	-994.3 $\mathrm{~kJ} \mathrm{~mol}^{-1}$	[0.7803518011785928, 0.8010970458827097, 0.8087463994891815]	0.796732	wrong
-569.210004474273 kJ/mol	-501 $\mathrm{~kJ} \mathrm{~mol}^{-1}$	[0.8172182143075225, 0.7862332055782079, 0.8067463426733038]	0.803399	wrong
562611.1111 g/mol	85 $\mathrm{~g} \mathrm{~mol}^{-1}$	[0.7726219904408632, 0.7838914614905151, 0.8108417062843484]	0.789118	wrong
206.2109867926688 J mol^-1 K^-1	199.4 $\mathrm{~J} \mathrm{~mol}^{-1} \mathrm{~K}^{-1}$	[0.7460985748532213, 0.7963562766038884]	0.771227	correct
125663.70614359174 T	5.9 $10^{-4} \mathrm{~T}$	[0.7996636297336694, 0.7709827241123602]	0.785323	wrong
0.4198412698412698 pm	0.42 $\mathrm{pm}$	[0.8295686015449766, 0.8382231173401514, 0.8648500816169674]	0.844214	correct
-5.9244001 kJ mol^-1	-6.42 $\mathrm{~kJ} \mathrm{~mol}^{-1}$	[0.7916780391271986, 0.809538167023339, 0.8247856975366936]	0.808667	correct
-14.56 K	272.8 $\mathrm{K}$	[0.8112859933603124, 0.7824715507316583]	0.796879	wrong
524.4560970112543 K	524 $ \mathrm{~K}$	[0.8535673822110289, 0.8196660756193367, 0.8382345739477377]	0.837156	correct
8.68 cm^3	8.7 $\mathrm{~cm}^3$	[0.8083832734058841, 0.859393048080716]	0.833888	correct
The predicted wavelength of the first excitation of a Buckminsterfullerene molecule is approximately 1.616 µm.	1.6 $\mu \mathrm{m}$	[0.7747318485049975, 0.8236425145776667, 0.8193509059957814]	0.805908	correct
File: quan_gpt4.txt
Text Before First Semicolon	Text After Second Semicolon	psolve average	psolve average Mean	if correct
1.827 eV	15.425 $\mathrm{eV}$	[0.8213262222423744, 0.8288632243654052]	0.825095	wrong
-0.968728710656876 kJ/mol	399 $\mathrm{~kJ} / \mathrm{mol}$	[0.808916603005013, 0.8163964410575678]	0.812657	wrong
1.4535397875239056e-35 J s	9.13 $10^{-35} \mathrm{~J} \mathrm{~s}$	[0.8017366322583692, 0.8225116216105232, 0.8251675536490121]	0.816472	wrong
1.5158753410828745e+19 eV	2.5151 $\mathrm{eV}$	[0.8235522699340937, 0.8190055044765803, 0.8489179086691762]	0.830492	wrong
-6.803381533270216 eV	-6.8 $\mathrm{eV}$	[0.7923608279953501, 0.8000218779791696, 0.8914962277150505]	0.82796	correct
A 't' orbital does not exist in standard atomic orbital nomenclature.	14	[0.8126786735875422, 0.8042041935828713]	0.808441	wrong
3	15	[0.8106810934676885, 0.8012081403185992]	0.805945	wrong
26.98 kcal/mol	27 $\mathrm{kcal} / \mathrm{mol}$	[0.8124569088018899, 0.8072167403998564]	0.809837	correct
1.7848278749698054 nm	1.8 $\mathrm{~nm}$	[0.8260918595135723, 0.8244812504403547, 0.8121981781420318]	0.820924	correct
0.06967761492922456	0.16	[0.8160915622917203, 0.7907314445539546]	0.803412	wrong
0.3323961 nm	0.332 $\mathrm{~nm}$	[0.8044933222828078, 0.8274727279313975, 0.8097782166130362]	0.813915	correct
0.0 degrees	54.7 $^{\circ}$	[0.7832402758102243, 0.7946615039719663, 0.7499063613287548]	0.775936	wrong
-14716.150317000001 kcal/mol	-59.24 $\mathrm{kcal} / \mathrm{mol}$	[0.8249201282216921, 0.8265424080688414, 0.838347137094997]	0.829937	wrong
4.75 eV	-31.95 $\mathrm{eV}$	[0.8236450745685575]	0.823645	wrong
The corresponding energy in eV is approximately 1.169064e-01 eV.	4.56 $\mathrm{eV}$	[0.8192392945280175, 0.8071164135532433]	0.813178	wrong
The number of CSFs in a full CI calculation of CH2SiHF using a 6-31G** basis set is approximately 2.147484e-19 * 10^28.	1.86 $10^{28} $	[0.7794991799514824, 0.7728895261459326, 0.7441842777230113]	0.765524	wrong
The ratio of the electrical and gravitational forces between a proton and an electron is: 2.2686614794312705 x 10^39	2.4 $10^{39}$	[0.827838333009549, 0.823912222691706, 0.8060178362492155]	0.819256	wrong
The probability of locating the particle between the given points could not be calculated due to failed estimation.	0.000216	[0.7755839603950377, 0.7573264450192907, 0.8378492966637641]	0.790253	wrong
The probability that the measured value of the system lies between x = 2.0000 Å and x = 2.0010 Å is approximately 49.782090 * 10^-6.	0.000216	[0.7925051680643321, 0.8103554455307219, 0.8469742829351034]	0.816612	wrong
1390.4 GHz	252.8 $\mathrm{GHz}$	[0.8415431088833327, 0.8192142119341591, 0.8023474476214939]	0.821035	wrong
The execution of one of the subtasks failed, hence an accurate final answer could not be obtained.	1.2 $10^{-8} \mathrm{eV}$	[0.808772964822464, 0.8115533808225157, 0.8366916655452904]	0.819006	wrong
7.5770e+14 s^-1	7.58 $10^{14} \mathrm{~s}^{-1}$	[0.8214624027294662, 0.858938538814173, 0.8353719950692996]	0.838591	correct
The dipole moment of the optimized structure is approximately 0.000000e+00 D.	1.41 $\mathrm{D}$	[0.765608332105621, 0.8061734136473472]	0.785891	wrong
The coefficient of Φ0 in the normalized CI-SD wave function is: 1.0014062014263776	0.9731	[0.8418501565767014]	0.84185	correct
1.0	1	[0.7557163898522324, 0.7709647634097795, 0.7550537325293977]	0.760578	correct
0.40502028141285434 N	0.405 $\mathrm{~N}$	[0.8145820742344712]	0.814582	correct
3.874874689447447	4	[0.749203630791126, 0.8278708590322351, 0.8487963889752196]	0.808624	correct
3.0183803592843037 x 10^26	3 $10^{26}$	[0.8020414862222088, 0.8183033290431521, 0.8255283902230431]	0.815291	correct
The ΔH0 for the reaction H2(g) → 2 H(g) is 432.069 kJ/mol.	432.07 $\mathrm{~kJ} / \mathrm{mol}$	[0.795688372758379, 0.8413830549433182, 0.8181575975005702]	0.81841	correct
0.14142122358683762 kJ/mol	0.14 $\mathrm{kJ} / \mathrm{mol}$	[0.8356367525671416, 0.8162305603266632]	0.825934	correct
The magnitude of the spin magnetic moment of an electron is: 1.606305664552142e-23 J/T	1.61 $10^{-23} \mathrm{~J} / \mathrm{T}$	[0.8290119944620965, 0.8570978256099199, 0.8266394440088264]	0.837583	correct
10 eV	3.333333333 $\mathrm{eV}$	[0.8065561849453812, 0.797396568553142, 0.7633153217500027]	0.789089	wrong
0.056 nm	0.264 $\mathrm{~nm}$	[0.7640662622719816, 0.7800976427801615]	0.772082	wrong
0.0 J.s	0	[0.82263839178332, 0.8320934980097109]	0.827366	correct
File: matter_gpt35.txt
Text Before First Semicolon	Text After Second Semicolon	psolve average	psolve average Mean	if correct
-2.14	2.14 ${\circ}$	[0.8104723228099829, 0.7688130152246169]	0.789643	wrong
-75,993.75	-75 $\mathrm{~J}$	[0.8099834893528999, 0]	0.404992	correct
-1004.5689988257608	-0.38 $\mathrm{~J} \mathrm{~mol}^{-1}$	[0.7948691487941157, 0]	0.397435	wrong
200.07300000000004	234.4 $ \mathrm{~K}$	[0.780322975798457, 0.8044377605904481, 0.8125516821086541]	0.799104	wrong
The temperature is: 19645.654965377948 K	5.5 $10^3 \mathrm{~K}$	[0.798612517405404, 0.8289344419538233]	0.813773	wrong
133.03548795944235	12 $\mathrm{~kJ}$	[0, 0.8014922865637925, 0.799125031439087]	0.533539	wrong
The energy gap between the valence and conduction bands is: 3.5424947872507793 eV	3.54 $\mathrm{eV}$	[0.8270379320277296]	0.827038	correct
The molar mass of tobacco seed globulin is 2.085362554933775e-12 g/mol.	3.61 $10^5 \mathrm{~g} \mathrm{~mol}^{-1}$	[0.7627849694943892, 0.8013516983104506, 0.8300421168312574]	0.79806	wrong
187419942.6600487	1.88 $10^8 \mathrm{~m} \mathrm{~s}^{-1}$	[0]	0	wrong
20.503561	62.2 $\mathrm{~kJ} \mathrm{~mol}^{-1}$	[0]	0	wrong
The probability that the electron is between x=4.95 nm and 5.05 nm is: 0.019998355143809585	0.020	[0.8059391710277652, 0.7976631369943817]	0.801801	correct
0.000990295504	-1270 $\mathrm{~kJ} \mathrm{~mol}^{-1}$	[0, 0, 0.7826919453231674, 0.7899814427708164, 0.7877181235625713]	0.472078	wrong
2.2163513116065072e-38 m	0.5	[0.7860742378706665, 0]	0.393037	wrong
The expected density of diamond is: 5.215539659199991e-05 g/cm^3	7.654 $\mathrm{~g} \mathrm{~cm}^{-3}$	[0.7763851929802472]	0.776385	wrong
111.79793234837828	0.87 $\mathrm{~m}$	[0.8005928650635128, 0.7746642561521989]	0.787629	wrong
3.340328199087948e-06	1.07 $10^3 \mathrm{~kJ} \mathrm{~mol}^{-1}$	[0.8115661778343647, 0.8153596654107219]	0.813463	wrong
-15116556.79664299	140 $\mathrm{~atm}$	[0.8726632288937739]	0.872663	wrong
The difference in local magnetic field between the two regions of the molecule is: -11.4 μT	11 $\mu \mathrm{T}$	[0.7862198086446147, 0.7856042526673451, 0.7931060166998462]	0.78831	wrong
1.0	0.8	[0.7199013158195012, 0]	0.359951	wrong
2.5e-14	1.7 $10^{-2} \mathrm{~s}$	[0.7727473330500697]	0.772747	wrong
The pressure at which the mean free path of argon at $20^{circ} mathrm{C}$ becomes comparable to the diameter of a $100 mathrm{~cm}^3$ vessel is XXX Pa.	0.195 $\mathrm{Pa}$	[0.7690642453182149]	0.769064	wrong
-12.250740599077483	-11.2 $\mathrm{~kJ} \mathrm{~mol}^{-1}$	[0.78622244979109, 0.7896302220406346, 0]	0.525284	correct
1.3252e-19 J	0.69 $\mathrm{~nm}$	[0.8319881406337828, 0.821110827146237, 0.8256584722839823]	0.826252	wrong
4.7746482927568594e-05	7.27 $10^6 \mathrm{~m} \mathrm{~s}^{-1}$	[0]	0	wrong
7273895.2162422715	7.27 $10^6 \mathrm{~m} \mathrm{~s}^{-1}$	[0]	0	wrong
0.0	0.123	[0.7829857928703635]	0.782986	wrong
0.001	7.97 $10^3$	[0.7978676294191475]	0.797868	wrong
The change in Gibbs free energy (ΔG) for the process is -16.58 J.	-17 $\mathrm{~J}$	[0.8743738192064366, 0.796126504118744]	0.83525	correct
1.6143653131574858	-1.46 $\mathrm{V}$	[0.7690954857269031]	0.769095	wrong
The mass of the solid will decrease by -85201.68 mg	16 $\mathrm{mg}$	[0.7915313801641549, 0.8094074236821562, 0.7976313885822003]	0.799523	wrong
0.005166784992338081	52 $\mathrm{pm}$	[0.8291674195940417, 0.7826462213354546]	0.805907	wrong
28024947479625.72	2.8 $10^{13} \mathrm{~Hz}$	[0.7972308928626499]	0.797231	wrong
39.69405000000001	48 $\mathrm{~mJ}$	[0.8299395599823495, 0.8643048232172251]	0.847122	wrong
39.69405000000001	48 $\mathrm{~mJ}$	[0.8299395599823495, 0.8643048232172251]	0.847122	wrong
4.788 x 10^3	4.4 $10^3$	[0.8040513811932041, 0.811471685452381, 0.7991677364378659]	0.804897	wrong
The ionization energy of krypton is 14.043250343814385 eV.	14 $\mathrm{eV}$	[0.8275796431616836, 0.8558795773412591, 0.8213622952110627]	0.834941	correct
0.2326	537 $\mathrm{s}$	[0, 0, 0.8003276400795362]	0.266776	wrong
1.0 K	4500 $\mathrm{~K}$	[0.7785763605957084, 0.7849982262916217, 0.8130692695524623]	0.792215	wrong
The standard enthalpy of formation of DyCl3(s) is -180.06 kJ/mol.	-994.3 $\mathrm{~kJ} \mathrm{~mol}^{-1}$	[0.8160557199689346, 0.8151587983313138, 0.8025103807535524]	0.811242	wrong
-394.79	-501 $\mathrm{~kJ} \mathrm{~mol}^{-1}$	[0.7991678923745144]	0.799168	wrong
The molar mass of the non-volatile organic compound is: 6.401229035974907 g/mol	85 $\mathrm{~g} \mathrm{~mol}^{-1}$	[0, 0.8106461157259955, 0]	0.270215	wrong
88.64300368146802	199.4 $\mathrm{~J} \mathrm{~mol}^{-1} \mathrm{~K}^{-1}$	[0.8288332988463168, 0.7723451210950016, 0.7837859770647495]	0.794988	wrong
40000.0	5.9 $10^{-4} \mathrm{~T}$	[0.7502117652061374]	0.750212	wrong
52.9	0.42 $\mathrm{pm}$	[0.808190260690262]	0.80819	wrong
-0.0	-6.42 $\mathrm{~kJ} \mathrm{~mol}^{-1}$	[0.8527372187562129, 0.8203820915113882]	0.83656	wrong
The melting point of ice under a pressure of 50 bar is: -2.14667961041822 K	272.8 $\mathrm{K}$	[0.8042784779531543, 0.7810073386557602]	0.792643	wrong
525.0365394166395	524 $ \mathrm{~K}$	[0.8161901720469048, 0.8130130662252363]	0.814602	correct
10.098300000000002	8.7 $\mathrm{~cm}^3$	[0.8746397316271027, 0.8363534442553692]	0.855497	wrong
0.0008475715427743347	1.6 $\mu \mathrm{m}$	[0.762972595623345, 0.8079890477864129, 0]	0.523654	wrong
File: chemmc_gpt35.txt
Text Before First Semicolon	Text After Second Semicolon	psolve average	psolve average Mean	if correct
0.12	0.123 nm	[0.8911129216379033]	0.891113	correct
3.52e-19	3.52 $10^{-19} \mathrm{~J}$	[0.8314696976821269, 0]	0.415735	correct
\frac{3}{2}	1.5	[0.771926539942947]	0.771927	wrong
0.3333333333333333	0.33333333	[0, 0, 0]	0	correct
2.94e-23 s	2.9 $10^{-23} \mathrm{~s}$	[0.7613909148404812]	0.761391	correct
1	1	[0.7761822363382599]	0.776182	correct
0.0819	0.082 V	[0.8756542607869607, 0.8043673798331175]	0.840011	correct
7.31e-19	479 $\mathrm{~N} \cdot \mathrm{m}^{-1}$	[0]	0	wrong
4.600548721972343e-06	3	[0, 0.8302243481078506]	0.415112	wrong
The wavelength of light emitted by the helium-neon laser is 473,755,464,601,769.94 meters.	4.738 $10^{14} \mathrm{~Hz}$	[0.8322800971178307]	0.83228	wrong
3.31e-23	6.6 $10^{-23} \mathrm{~kg} \cdot \mathrm{m} \cdot \mathrm{s}^{-1}$	[0.85893612302779]	0.858936	wrong
The ionization energy of singly ionized helium is -10.20 eV	54.394 $\mathrm{eV}$	[0.8292963570487354, 0.8453190327418477]	0.837308	wrong
The uncertainty in the energy of the gamma ray produced is 3.31e-22 J.	7 $10^{-22} \mathrm{~J}$	[0.8094901008095129, 0.7976427151042377]	0.803566	wrong
91.35	91.17 nm	[0.8205266462531245, 0.7920255889818474]	0.806276	correct
3.3130e-25 J	7 $10^{-25} \mathrm{~J}$	[0.8028988017969807]	0.802899	wrong
2532.49	2500 $\mathrm{K}$	[0.8157899390155694, 0.8160409857925096]	0.815915	correct
0	-0.5	[0.7722722597306417, 0.779519885316092, 0.7737127068439784]	0.775168	wrong
0.3333333333333333	0.3333333	[0]	0	correct
-0.25%	-0.249 %	[0.7643205190031036, 0]	0.38216	correct
7.00	7.00	[0.8309090930789301]	0.830909	correct
86417974938787266560.00 mm	0.139 mm	[0.7845939024920486]	0.784594	wrong
1.01e+16	1.07 $10^{16}$ photons	[0.7940788784627433, 0.7942259605388972]	0.794152	wrong
The fundamental vibrational frequency of Cl35Cl35 is 5.69 cm^(-1).	556 $\mathrm{~cm}^{-1}$	[0.8279036211372902, 0.8077582358187997]	0.817831	wrong
1.99e-15	2 $10^{-15} \mathrm{~J}$	[0.8293206061166357]	0.829321	correct
The ground-state energy of the mesonic atom is -3.9055e-55 kg.	1.69 $10^{-28} \mathrm{~kg}$	[0.8054179375385638, 0.8090125129928459, 0.8164828458591179]	0.810304	wrong
1090922590.7561278	1.81 $10^{10} \mathrm{~m}^{-1}$	[0.7706861648985474]	0.770686	wrong
The angular position of the first maximum is 0.34 degrees. The distance between the central maximum and the first maximum is 0.20 mm.	12 mm	[0.7610305453450344, 0.763617938985956]	0.762324	wrong
2.89e+06	3.7 $10^7 \mathrm{~m} \cdot \mathrm{s}^{-1}$	[0.8159935259360792]	0.815994	wrong
1.01e-05	1.01 10^{-5} \mathrm{~m}	[0.8064080326605206, 0.775085346161751]	0.790747	correct
The energy difference between the absorbed and emitted photons is -1.6347e-18 J.	2	[0.8346807181601047, 0.836008439040388, 0.8073757541484614]	0.826022	wrong
ω_e_x_e = 43261140000000.07 cm^(-1)	0.01961	[0.8069463346075484, 0.8144545485161019]	0.8107	wrong
2.3417e-12	313 $ \mathrm{~N} \cdot \mathrm{m}^{-1}$	[0.8213164107006241]	0.821316	wrong
0.00	1.25 $10^{-3} \%$	[0.7774636214575877, 0.7823665792018334, 0.7525296011831625]	0.770787	wrong
The de Broglie wavelength of an electron in the beam is 2.43e-08 meters. The kinetic energy of an electron in the beam is 1.60e-17 J·electron^(-1).	1.602 $10^{-17} \mathrm{~J} \cdot$ electron ${ }^{-1}$	[0.8761175273469166, 0.8407044844543862]	0.858411	correct
